# Supplementary material for: The acute effects of working time patterns on fatigue and sleep quality using daily measurements of 6195 observations among 223 shift workers
Source: PubMed Central journal article supplement (PMC8504543; doi:10.5271/sjweh.3964), 2021-08-31
Supplement: SJWEH-47-446-S001.pdf [file SJWEH-47-446-S001.pdf]

# The acute effects of working time patterns on fatigue and sleep quality using daily measurements of 6195 observations among 223 shift workers<sup>1</sup>

by Hardy A van de Ven, PhD,<sup>2</sup> Gerben Hulsege, PhD, Thijmen Zoomer, MSc, Elsbeth M de Korte, MSc, Alex Burdorf, PhD, Karen M Oude Hengel, PhD

1. *Supplementary material*

2. *Correspondence to: Hardy van de Ven, Netherlands Organisation for Applied Scientific Research TNO, Schipholweg 77, 2316 ZL, Leiden, The Netherlands. [E-mail: hardy.vandeven@tno.nl]*

Table S1. Fixed effects model of the relationships between shift schedule characteristics and fatigue and sleep quality (scale 0 to 10; higher score indicating more fatigue and poorer sleep quality).

|                                                 | Fatigue              |                        | Sleep quality        |                        |
|-------------------------------------------------|----------------------|------------------------|----------------------|------------------------|
|                                                 | Unadjusted model     | Adjusted type of shift | Unadjusted model     | Adjusted type of shift |
|                                                 | B (95% CI)           | B (95% CI)             | B (95% CI)           | B (95% CI)             |
| Type of shift                                   |                      |                        |                      |                        |
| Morning shift                                   | 0.11 (-0.30–0.53)    | NA                     | 0.28 (-0.14–0.71)    | NA                     |
| Day shift                                       | Ref.                 | NA                     | Ref.                 | NA                     |
| Evening shift                                   | -0.09 (-0.34–0.16)   | NA                     | 0.08 (-0.16–0.32)    | NA                     |
| Night shift                                     | 0.22 (0.05–0.39)     | NA                     | 0.64 (0.47–0.81)     | NA                     |
| Day off following workday                       | 0.50 (0.33–0.68)     | NA                     | 0.10 (-0.07–0.27)    | NA                     |
| Second or more days off following a working day | -0.46 (-0.63– -0.30) | NA                     | -0.07 (-0.24–0.09)   | NA                     |
| Time between shifts                             |                      |                        |                      |                        |
| >16h rest                                       | Ref.                 | Ref.                   | Ref.                 | Ref.                   |
| 11-16h rest                                     | 0.41 (0.23–0.58)     | 0.44 (0.26–0.61)       | -0.09 (-0.26–0.09)   | -0.03 (-0.20–0.13)     |
| <11h rest quick return                          | 1.65 (0.29–2.01)     | 1.94 (1.57–2.31)       | -0.27 (-0.64–0.11)   | 0.15 (-0.23–0.54)      |
| Rotation direction                              |                      |                        |                      |                        |
| Forward                                         | Ref.                 | Ref.                   | Ref.                 | Ref.                   |
| Stable                                          | 0.21 (0.003–0.42)    | 0.24 (0.03–0.45)       | -0.13 (-0.32–0.06)   | -0.01 (-0.20–0.18)     |
| Backward                                        | 0.33 (0.09–0.57)     | 0.50 (0.24–0.75)       | -0.32 (-0.55– -0.09) | 0.13 (-0.13–0.38)      |

| Successive night shifts |                         |      |                          |      |
|-------------------------|-------------------------|------|--------------------------|------|
| No night shift          | Ref.                    | Ref. | Ref.                     | Ref. |
| 1 in a row              | -0.003 (-0.15–0.14)     | NA   | 0.69 (0.56–0.83)         | NA   |
| 2 in a row              | 0.69 (0.50–0.89)        | NA   | 0.57 (0.38–0.76)         | NA   |
| 3 in a row              | 0.46 (0.13–0.80)        | NA   | 0.48 (0.17–0.79)         | NA   |
| <b>≥4 in a row</b>      | <b>0.60 (0.18–1.02)</b> | NA   | <b>0.31 (-0.10–0.72)</b> | NA   |

Boldface indicates statistical significance ( $p < 0.05$ ). NA: not applicable as it was not applicable to those analyses for type of shift.
